# Supplementary material
Source: publisher site journal article supplement (https://www.dovepress.com/article/317779)
Supplement: Supplementary file 1 [file get_supplementary_file.php]

**Supplementary Table 1** Socio-demographics characteristics of the participants

|  | All participants (n= 428) | Pharmacists (n= 50) | Non pharmacists (n= 378) | P |
| --- | --- | --- | --- | --- |
| **Most common signs and symptoms of COVID-19**  Diarrhea  Dry cough  Fever  General weakness  Headache  Loss of smell sensation  Loss of taste sensation  Shortness of breath  No signs or symptoms  I don't know | 1 (0.2)  45 (10.5)  242 (56.5)  8 (1.9)  12 (2.8)  18 (4.2)  18 (4.2)  60 (14)  21 (4.9)  3 (0.7) | 0  5 (10)  33 (66)  2 (4)  1 (2)  3 (6)  0  5 (10)  0  1 (2) | 1 (0.26)  40 (10.58)  209 (55.29)  6 (1.59)  11 (2.91)  15 (3.97)  18 (4.76)  55 (14.55)  21 (5.56)  2 (0.53) | 0.21 |
| **Which of the following methods you think can protect yourself and others against COVID-19?**  Frequent hand hygiene with soap and water or hand sanitizer for at least 20 seconds  Cough or sneeze into a bent elbow or tissue and then immediately disposing of the tissue  Wear medical masks as an acceptable option in case of shortages of respirators (N95, FFP2, or FFP3) when dealing with COVID-19 patients  Wearing gloves  Environmental cleaning and disinfection  Maintain physical distances  Limit the number of persons present in the room to the absolute minimum required for the patient's care and support  Avoid touching any part of your face  Protection by seasonal influenza vaccine  Consumption of protective medications such as vitamin C | 407 (95.1)  326 (76.2)  358 (83.6)  222 (51.9)  286 (67)  359 (83.9)  343 (80.1)  352 (82.2)  106 (24.8)  152 (35.5) | 49 (98)  34 (68)  43 (86)  14 (28)  28 (56)  41 (82)  37 (74)  41 (82)  6 (12)  4 (8) | 358 (94.71)  292 (77.25)  315 (83.33)  208 (55.03)  258 (68.44)  318 (84.13)  306 (80.95)  311 (82.28)  100 (26.46)  148 (39.15) | 0.49  0.15  0.63  <0.001  0.08  0.70  0.25  0.96  0.03  <0.001 |
| **Methods of transmission of COVID-19 infection to humans**  Close contact with an infected person within 1 meter  Respiratory droplets when an infected person coughs, sneezes, or talks  Spread by people who are not showing symptoms  Contact with objects used by an infected person  Aerosol generating procedures and support treatment  Contact with objects and parcels sent by courier and delivery  Takeaway food and groceries  I don't know | 364 (85.1)  410 (95.8)  282 (65. 9)  319 (74.5)  258 (60.3)  133 (31.1)  94 (22)  4 (0.9) | 41 (82)  49 (98)  32 (64)  36 (72)  16 (32)  10 (20)  8 (16)  0 | 323 (85.45)  361 (95.5)  250 (66.14)  283 (74.87)  242 (64.02)  123 (32.54)  86 (22.75)  4 (1.06) | 0.52  0.71  0.76  0.66  <0.001  0.07  0.28  >0.99 |
| **Management of COVID 19**  Patients with a mild clinical presentation (absence of viral pneumonia and hypoxia) may not initially require hospitalization, and many patients will be able to manage their illness at home  Treatment of COVID-19 is symptomatic, and oxygen therapy represents the major treatment intervention for patients with severe infection  Intensive and emergency treatment should be given to all diagnosed patients  Systemic corticosteroids for the treatment of viral pneumonia or acute respiratory distress syndrome (ARDS) are not recommended  Although no antiviral treatments have been approved, several approaches have been proposed  Mechanical ventilation may be necessary in cases of respiratory failure refractory to oxygen therapy  Hemodynamic support is essential for managing septic shock  I don't know | 359 (83.7)  314 (73.2)  95 (22.1)  106 (24.7)  241 (56.2)  340 (79.3)  231 (53.9)  17 (4) | 43 (86)  37 (74)  5 (10)  12 (24)  148 (56.1)  213 (80.7)  155 (58.7)  6 (2.3) | 316 (83.6)  277 (73.28)  90 (23.81)  94 (24.87)  93 (56.7)  127 (77.4)  76 (46.3)  11 (6.7) | 0.66  >0.99  0.03  0.89  0.9  0.42  0.01  0.04 |

**Supplementary Table 2** Multivariable predictors of good knowledge

|  | **All participants (n= 428)** | **Pharmacists (n= 50)** | **Non pharmacists (n= 378)** | **P** |
| --- | --- | --- | --- | --- |
| **K1**: COVID-19 is caused by Beta coronavirus | 168 (39.3) | 18 (36.73) | 150 (39.68) | 0.69 |
| **K2**: COVID-19 is not an airborne virus | 162 (37.9) | 18 (36) | 144 (38.1) | 0.77 |
| **K3**: People with co-morbidity (Diabetes, cancer and other chronic diseases) are at higher risk of serious illness | 406 (94.9) | 48 (96) | 358 (94.71) | >0.99 |
| **K4**: Incubation period for COVID-19 virus can vary from person to person | 354 (82.7) | 37 (74) | 317 (83.86) | 0.11 |
| **K5**: COVID-19 patients should be isolated | 416 (97.2) | 50 (100) | 366 (96.83) | 0.38 |
| **K6**: There are no specific COVID-19 vaccines | 389 (90.9) | 46 (92) | 343 (90.74) | >0.99 |
| **K7**: Real-time reverse transcription polymerase chain reaction (rRT-PCR) technique is used to diagnose COVID-19 | 301 (70.3) | 41 (82) | 260 (68.78) | 0.06 |
| **K8**: COVID-19 can be fatal | 385 (90) | 45 (90) | 340 (89.95) | 0.99 |
| **K9**: Delayed seeking treatment could lead to death | 347 (81.1) | 39 (78) | 308 (81.48) | 0.56 |
| **K10**: Most people (about 80) recover from the disease without needing special treatment | 371 (86.7) | 45 (90) | 326 (86.24) | 0.66 |
| Knowledge score | 8 (7- 9) | 8 (7- 9) | 8 (7- 9) | 0.61 |

Continuous data were presented as median (25th: 75th percentiles) and categorical data as numbers and percentages (in brackets). A score of 1 was given to "Yes" (for correct answer) and 0 to other answers.

**Supplementary Table 3** Multivariable predictors of good attitude

|  | **All participants (n= 428)** | **Pharmacists (n= 50)** | **Non pharmacists (n= 378)** | **P** |
| --- | --- | --- | --- | --- |
| **A1**: COVID-19 infection is preventable  Strongly agree  Agree  Undecided  Disagree  Strongly disagree | 156 (36.5)  210 (49.1)  44 (10.3)  11 (2.6)  7 (1.7) | 21 (42)  25 (50)  3 (6)  1 (2)  0 | 135 (35.71)  185 (48.94)  41 (10.85)  10 (2.65)  7 (1.85) | 0.78 |
| **A2**: Prevalence of COVID-19 can be reduced by the active participation of health care worker in hospital infection control program  Strongly agree  Agree  Undecided  Disagree  Strongly disagree | 171 (40)  204 (47.7)  34 (7.9)  16 (3.7)  3 (0.7) | 16 (32)  28 (56)  6 (12)  0  0 | 155 (41.01)  176 (46.56)  28 (7.41)  16 (4.23)  3 (0.79) | 0.27 |
| **A3**: Any related information about COVID-19 should be disseminated among peers and other healthcare workers  Strongly agree  Agree  Undecided  Disagree  Strongly disagree | 196 (45.8)  183 (42.8)  34 (7.9)  9 (2.1)  6 (1.4) | 21 (42)  23 (46)  4 (8)  1 (2)  1 (2) | 175 (46.3)  160 (42.33)  30 (7.9)  8 (2.12)  5 (1.32) | 0.90 |
| **A4**: Special caution must be taken when a person presents with symptoms of COVID-19  Strongly agree  Agree  Undecided  Disagree  Strongly disagree | 301 (70.3)  116 (27.1)  6 (1.4)  5 (1.2)  0 | 41 (82)  8 (16)  0  1 (2)  0 | 260 (68.78)  108 (28.57)  6 (1.59)  4 (1.06)  0 | 0.14 |
| **A5**: Healthcare providers are among high-risk groups  Strongly agree  Agree  Undecided  Disagree  Strongly disagree | 282 (65.9)  129 (30.2)  13 (3)  4 (0.9)  0 | 34 (68)  15 (30.61)  0  1 (2)  0 | 248 (65.61)  114 (30.16)  13 (3.44)  3 (0.79)  0 | 0.41 |
| **A6**: Healthcare workers must educate themselves with all the information about COVID-19  Strongly agree  Agree  Undecided  Disagree  Strongly disagree | 315 (73.6)  102 (23.8)  8 (1.9)  3 (0.7)  0 | 42 (84)  8 (16)  0  0  0 | 273 (72.22)  94 (24.87)  8 (2.12)  3 (0.79)  0 | 0.37 |
| **A7**:C OVID-19 infection negatively impacts the economy and, therefore, the quality of the healthcare system  Strongly agree  Agree  Undecided  Disagree  Strongly disagree | 256 (59.8)  128 (29.9)  22 (5.1)  14 (3.3)  8 (1.9) | 32 (64)  13 (26)  2 (4)  3 (6)  0 | 224 (59.26)  115 (30.42)  20 (5.29)  11 (2.91)  8 (2.12) | 0.63 |
| **A8:** Gowns, gloves, mask, and goggles must be used when dealing with COVID-19 patients  Strongly agree  Agree  Undecided  Disagree  Strongly disagree | 340 (79.4)  77 (18)  7 (1.6)  3 (0.7)  1 (0.2) | 40 (80)  9 (18)  0  1 (2)  0 | 300 (79.37)  68 (17.99)  7 (1.85)  2 (0.53)  1 (0.26) | 0.59 |
| **A9**: Important to report a suspected case to health authorities  Strongly agree  Agree  Undecided  Disagree  Strongly disagree | 306 (71.5)  110 (25.7)  10 (2.3)  1 (0.2)  1 (0.2) | 35 (70)  14 (28)  1 (2)  0  0 | 271 (71.69)  96 (25)  9 (2.38)  1 (0.26)  1 (0.26) | 0.92 |
| **A10**: Important to use a face mask during working hours  Strongly agree  Agree  Undecided  Disagree  Strongly disagree | 324 (75.7)  82 (19.2)  16 (3.7)  5 (1.2)  1 (0.2) | 39 (78)  9 (18)  1 (2)  1 (2)  0 | 285 (75.40)  73 (19.31)  15 (3.97)  4 (1.06)  1 (0.26) | 0.73 |
| **A11**: Handling COVID-19 patient threatens medical and paramedical staff  Strongly agree  Agree  Undecided  Disagree  Strongly disagree | 213 (49.8)  152 (35.5)  38 (8.9)  19 (4.4)  6 (1.4) | 26 (52)  18 (36)  4 (8)  2 (4)  0 | 187 (49.47)  134 (35.45)  34 (8.99)  17 (4.5)  6 (1.56) | >0.99 |
| **A12**: I'm afraid of becoming infected at work  Strongly agree  Agree  Undecided  Disagree  Strongly disagree | 149 (34.8)  152 (35.5)  51 (11.9)  50 (11.7)  26 (6.1) | 20 (40)  22 (44)  2 (4)  4 (8)  2 (4) | 129 (34.13)  130 (34.39)  49 (12.96)  46 (12.17)  24 (6.35) | 0.24 |
| **A13**: Implementation of preventive measures (lockdown, closure of schools, social distancing) can stop the spread of the COVID-19 pandemic  Strongly agree  Agree  Undecided  Disagree  Strongly disagree | 191 (44.6)  162 (37.9)  39 (9.1)  27 (6.3)  9 (2.1) | 28 (56)  16 (32)  3 (6)  3 (6)  0 | 163 (43.12)  146 (38.62)  36 (9.52)  24 (6.35)  9 (2.38) | 0.52 |
| **A14**:In fighting COVID-19, everyone has the same responsibility  Strongly agree  Agree  Undecided  Disagree  Strongly disagree | 257 (60.1)  129 (30.1)  21 (4.9)  14 (3.3)  7 (1.6) | 36 (72)  12 (24)  2 (4)  0  0 | 221 (58.47)  117 (30.95)  19 (5.03)  14 (3.7)  7 (1.85) | 0.43 |
| **A15**: Misinformation and rumors spread widely during the current outbreak of the COVID-19  Strongly agree  Agree  Undecided  Disagree  Strongly disagree | 199 (46.5)  180 (42.1)  39 (9.1)  7 (1.6)  3 (0.7) | 32 (64)  17 (34)  1 (2)  0  0 | 167 (44.18)  163 (43.12)  38 (10.05)  7 (1.85)  3 (0.79) | 0.08 |
| **A16**: Postponing the annual pilgrimage amid the COVID-19 pandemic  Strongly agree  Agree  Undecided  Disagree  Strongly disagree | 187 (43.7)  154 (36)  75 (17.5)  5 (1.2)  7 (1.6) | 21 (42)  14 (28)  12 (24)  1 (2)  2 (4) | 166 (43.92)  140 (37.04)  63 (16.67)  4 (1.06)  5 (1.32) | 0.19 |
| **A17**: Saudi Arabia will win the battle against the COVID-19 pandemic  Strongly agree  Agree  Undecided  Disagree  Strongly disagree | 252 (58.9)  135 (31.5)  36 (8.4)  3 (0.7)  2 (0.5) | 35 (70)  12 (24)  1 (2)  2 (4)  0 | 217 (57.41)  123 (32.54)  35 (9.26)  1 (0.26)  2 (0.53) | 0.02 |
| Attitude score | 76 (70- 80) | 78 (73- 80) | 75.5 (70- 81) | 0.15 |

Continuous data were presented as median (25th- 75th percentiles) and categorical data as numbers and percentages. A score of 5 was given to strongly agree, 4 to agree, 3 to undecided, 2 to disagree, and 1 to strongly disagree.

**Supplementary Table 4** Multivariable predictors of good practice

|  | **All participants (n= 428)** | **Pharmacists (n= 50)** | **Non pharmacists (n= 378)** | **P** |
| --- | --- | --- | --- | --- |
| **P1**.Use soap and water to wash my hands continuously outside the workplace  Always  Often  Sometimes  Rarely  Never | 316 (73.8)  82 (19.2)  26 (6.1)  3 (0.7)  1 (0.2) | 46 (92)  2 (4)  2 (4)  0  0 | 270 (71.43)  80 (21.16)  24 (6.35)  3 (0.79)  1 (0.26) | 0.01 |
| **P2**.Use soap and water to wash my hands continuously inside the workplace  Always  Often  Sometimes  Rarely  Never | 335 (78.3)  60 (14)  28 (6.5)  5 (1.2)  0 | 47 (94)  2 (4)  1 (2)  0  0 | 288 (76.19)  58 (15.34)  27 (7.14)  5 (1.32)  0 | 0.04 |
| **P3**.Put on a respirator or facemask before entry into the patient room or care area  Always  Often  Sometimes  Rarely  Never | 361 (84.4)  41 (9.6)  25 (5.8)  0  1 (0.2) | 42 (84)  5 (10)  3 (6)  0  0 | 319 (84.39)  36 (9.52)  22 (5.82)  0  1 (0.26) | 0.96 |
| **P4**.Cover my nose and mouth during sneezing or coughing  Always  Often  Sometimes  Rarely  Never | 376 (87.9)  38 (8.9)  14 (3.3)  0  0 | 48 (96)  1 (2)  1 (2)  0  0 | 328 (86.77)  37 (9.79)  13 (3.44)  0  0 | 0.17 |
| **P5**.Throw away the used tissue  Always  Often  Sometimes  Rarely  Never | 368 (86)  35 (8.2)  15 (3.5)  1 (0.2)  9 (2.1) | 46 (92)  4 (8)  0  0  0 | 322 (85.19)  31 (8.2)  15 (3.97)  1 (0.26)  9 (2.38) | 0.53 |
| **P6**.Avoid touching my eyes, nose, or mouth as far as I can  Always  Often  Sometimes  Rarely  Never | 334 (78)  65 (15.2)  23 (5.4)  2 (0.5)  4 (0.9) | 43 (86)  5 (10)  1 (2)  0  1 (2) | 291 (76.98)  60 (15.87)  22 (5.82)  2 (0.53)  3 (0.79) | 0.42 |
| **P7**.Use face mask in crowds  Always  Often  Sometimes  Rarely  Never | 372 (86.9)  35 (8.2)  19 (4.4)  1 (0.2)  1 (0.2) | 45 (90)  2 (4)  3 (6)  0  0 | 327 (86.51)  33 (8.73)  16 (4.23)  1 (0.26)  1 (0.26) | 0.60 |
| **P8**.Use gloves inside the workplace  Always  Often  Sometimes  Rarely  Never | 244 (57)  67 (15.7)  67 (15.7Z)  28 (6.5)  22 (5.1) | 15 (30)  8 (16)  10 (20)  8 (16)  9 (18) | 229 (60.58)  59 (15.61)  57 (15.08)  20 (5.29)  13 (3.44) | <0.001 |
| **P9**.Use gloves outside the workplace  Always  Often  Sometimes  Rarely  Never | 104 (24.3)  69 (16.1)  126 (29.4)  56 (13.1)  73 (17.1) | 11 (22)  8 (16)  13 (26)  10 (20)  8 (16) | 93 (24.6)  61 (16.14)  113 (29.89)  46 (12.17)  65 (17.2) | 0.67 |
| **P10**.Carefully handle suspected patient's belongings  Always  Often  Sometimes  Rarely  Never | 331 (77.3)  63 (14.7)  30 (7)  1 (0.2)  3 (0.7) | 42 (84)  4 (8)  2 (4)  0  2 (4) | 289 (76.46)  59 (15.61)  28 (7.41)  1 (0.26)  1 (0.26) | 0.05 |
| **P11**.Keep on healthy eating  Always  Often  Sometimes  Rarely  Never | 276 (64.5)  86 (20.1)  52 (12.2)  10 (2.3)  4 (0.9) | 33 (66)  9 (18)  8 (16)  0  0 | 243 (64.29)  77 (20.37)  44 (11.64)  10 (2.65)  4 (1.06) | 0.52 |
| **P12**.Maintain physical activity  Always  Often  Sometimes  Rarely  Never | 260 (60.8)  96 (22.4)  59 (13.8)  9 (2.1)  4 (0.9) | 34 (68)  11 (22)  4 (8)  1 (2)  0 | 226 (59.79)  85 (22.49)  55 (14.55)  8 (2.12)  4 (1.06) | 0.73 |
| **P13**.Educate patients about the disease  Always  Often  Sometimes  Rarely  Never | 286 (66.8)  95 (22.2)  35 (8.2)  9 (2.1)  3 (0.7) | 36 (72)  7 (14)  4 (8)  3 (6)  0 | 250 (66.14)  88 (23.28)  31 (8.2)  6 (1.59)  3 (0.79) | 0.18 |
| **P14**.Avoid crowded places  Always  Often  Sometimes  Rarely  Never | 331 (77.3)  70 (16.4)  23 (5.4)  2 (0.5)  2 (0.5) | 45 (90)  4 (8)  0  0  1 (2) | 286 (75.66)  66 (17.46)  23 (6.08)  2 (0.53)  1 (0.26) | 0.04 |
| **P15**.Change my work clothes (scrub, lab coat, uniform, etc..) before leaving work  Always  Often  Sometimes  Rarely  Never | 252 (58.9)  63 (14.7)  55 (12.9)  21 (4.9)  37 (8.6) | 30 (60)  6 (12)  7 (14)  1 (2)  6 (12) | 222 (58.73)  57 (15.08)  48 (12.70)  20 (5.29)  31 (8.20) | 0.76 |
| **P16**.Maintained quarantine with family  Always  Often  Sometimes  Rarely  Never | 267 (62.4)  98 (22.9)  38 (8.9)  12 (2.8)  13 (3) | 39 (78)  5 (10)  4 (8)  2 (4)  0 | 228 (60.32)  93 (24.60)  34 (8.99)  10 (2.65)  13 (3.44) | 0.06 |
| Practice score | 74 (68- 78) | 72.5 (69- 77) | 74 (67- 78) | 0.83 |

Continuous data were presented as median (25th- 75th percentiles) and categorical data as numbers and percentages (given in brackets). A score of 5 was given to always, 4 to often, 3 to sometimes, 2 to rarely, and 1 to never.
